# Supplementary material for: Solvent-free synthesis of new open-framework oxalate structures
Source: Royal Society of Chemistry journal article supplement (doi:10.1039/c2ce25856k), 2012-01-01
Supplement: c2ce25856k.pdf [file c2ce25856k.pdf]

## Solvent-Free Synthesis of New Open-Framework Oxalate Structures

Chunmei Duan,<sup>†</sup> Daibing Luo,<sup>‡</sup> Hongmei Zeng,<sup>†</sup> Maoping Kang,<sup>†</sup> and Zhien Lin\*,<sup>†</sup>

<sup>†</sup> *College of Chemistry, Sichuan University, Chengdu 610064, People's Republic of  
China*

<sup>‡</sup> *Analytical & Testing Center, Sichuan University, Chengdu 610064, People's Republic  
of China*

\* To whom correspondence should be addressed. E-mail: [zhienlin@scu.edu.cn](mailto:zhienlin@scu.edu.cn)

Reagents were purchased commercially and used without further purification. The CHN analysis was carried out on a Euro EA3000 analyzer. Powder X-ray diffraction (XRD) data were obtained using a Rigaku D/MAX-rA diffractometer with Cu-K $\alpha$  radiation ( $\lambda = 1.5418 \text{ \AA}$ ). IR spectra (KBr pellet) were recorded on an ABB Bomen MB 102 spectrometer. The thermogravimetric analyses were performed on a NETSCHZ STA-449C thermoanalyzer in a flow of N<sub>2</sub> with a heating rate of 10 °C/min from 40 to 700 °C.

### **Synthesis:**

Synthesis of (Hdpa)<sub>4</sub>·Zn<sub>4</sub>(ox)<sub>6</sub>·1.5H<sub>2</sub>O (**1**): A mixture of Zn(OAc)<sub>2</sub>·2H<sub>2</sub>O (0.439 g), H<sub>2</sub>C<sub>2</sub>O<sub>4</sub>·2H<sub>2</sub>O (0.126 g) and diisopropylamine (0.204 g) was sealed in a Teflon-lined stainless steel autoclave and heated at 150 °C for 9 d. When the autoclave was cooled to room temperature, colorless block-like crystals were obtained (28.4% yield based on zinc). The product was washed with distilled water and dried in air. Elemental analysis confirmed its composition. Anal. Found: C, 34.92; H, 5.43; N, 4.52. Calcd: C, 35.28; H, 5.51; N, 4.57.

Synthesis of (Hdpa)<sub>2</sub>·Co<sub>2</sub>(ox)<sub>3</sub>·2H<sub>2</sub>O (**2**): A mixture of Co(OAc)<sub>2</sub>·2H<sub>2</sub>O (0.498 g), H<sub>2</sub>C<sub>2</sub>O<sub>4</sub>·2H<sub>2</sub>O (0.630 g) and diisopropylamine (0.204 g) was sealed in a Teflon-lined

stainless steel autoclave and heated at 150 °C for 8 d. When the autoclave was cooled to room temperature, red prism-like crystals were obtained (27% yield based on cobalt). The product was washed with distilled water and dried in air. Elemental analysis confirmed its composition. Anal. Found: C, 33.18; H, 5.64; N, 4.53. Calcd: C, 34.74; H, 5.83; N, 4.50.

Synthesis of  $\text{H}_2\text{dmpda}\cdot\text{Mn}_2(\text{H}_2\text{PO}_4)_2(\text{ox})_2\cdot\text{H}_2\text{O}$  (**3**): A mixture of  $\text{Mn}(\text{H}_2\text{PO}_4)_2\cdot 2\text{H}_2\text{O}$  (0.569 g),  $\text{H}_2\text{C}_2\text{O}_4\cdot 2\text{H}_2\text{O}$  (0.378 g) and N, N-dimethyl-1,3-propanediamine (0.201 g) was sealed in a Teflon-lined stainless steel autoclave and heated at 150 °C for 7 d. When the autoclave was cooled to room temperature, light-pink rod-like crystals were obtained (22% yield based on manganese). The product was washed with distilled water and dried in air. Elemental analysis confirmed its composition. Anal. Found: C, 17.61; H, 4.52; N, 4.57. Calcd: C, 17.95; H, 3.68; N, 4.65.

Synthesis of  $\text{Zn}(\text{ox})(\text{L1})\cdot 0.4\text{H}_2\text{O}$  (**4**): A mixture of  $\text{Zn}(\text{OAc})_2\cdot 2\text{H}_2\text{O}$  (0.439 g),  $\text{H}_2\text{C}_2\text{O}_4\cdot 2\text{H}_2\text{O}$  (0.756 g) and N, N-dimethyl-ethylenediamine (0.184 g) was sealed in a Teflon-lined stainless steel autoclave and heated at 150 °C for 10 d. When the autoclave was cooled to room temperature, colorless block-like crystals were obtained (35% yield based on zinc). The product was washed with distilled water and dried in air. Elemental analysis confirmed its composition. Anal. Found: C, 29.12; H, 3.77; N, 8.74. Calcd: C,

29.95; H, 4.02; N, 8.73.

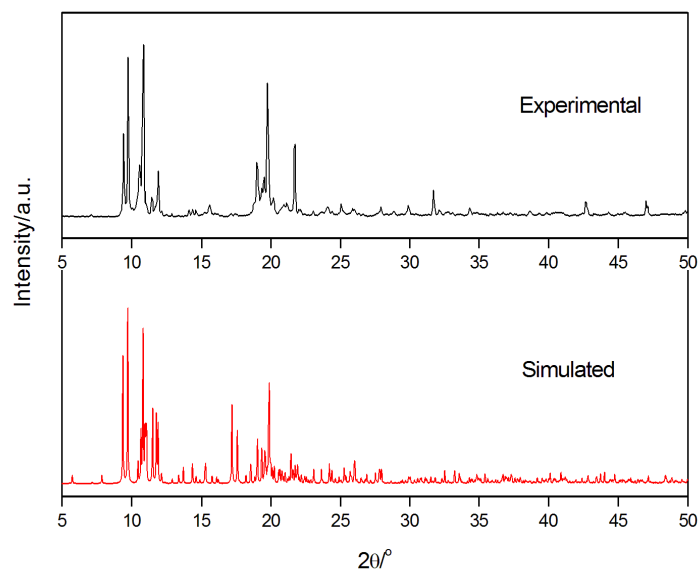

**Figure S1.** Experimental and simulated XRD patterns of compound **1**.

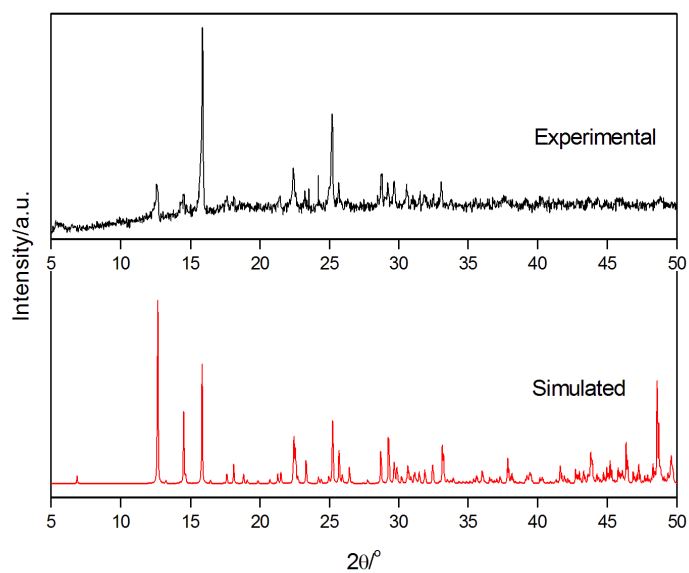

**Figure S2.** Experimental and simulated XRD patterns of compound **3**.

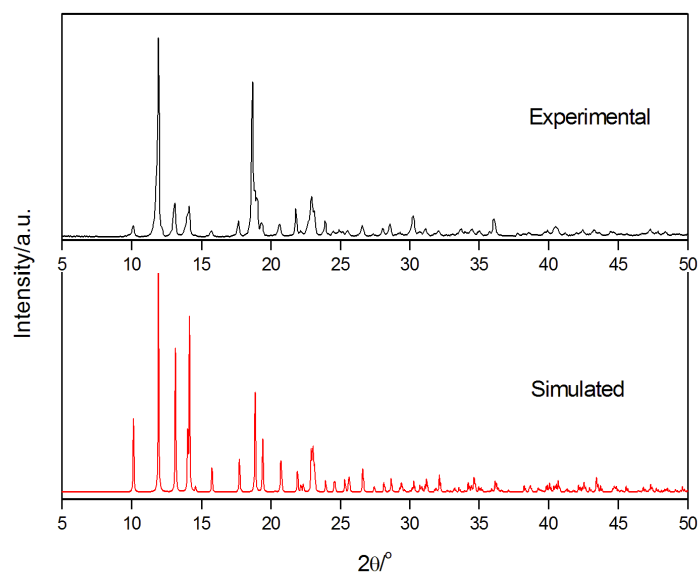

**Figure S3.** Experimental and simulated XRD patterns of compound **4**

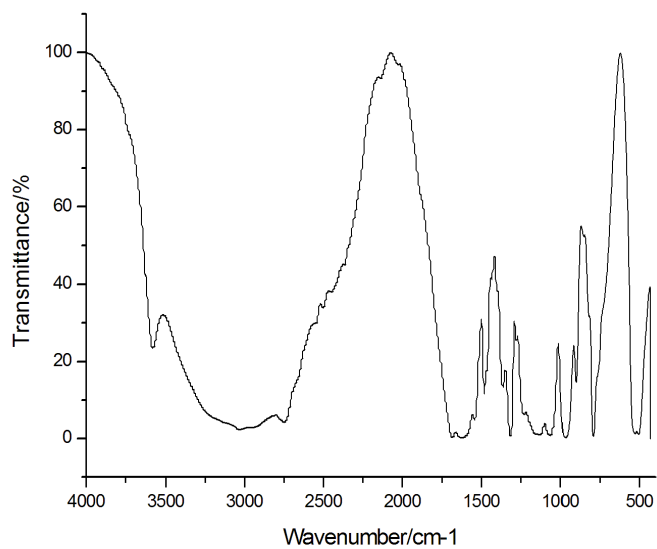

**Figure S4.** IR spectra of compound **1**

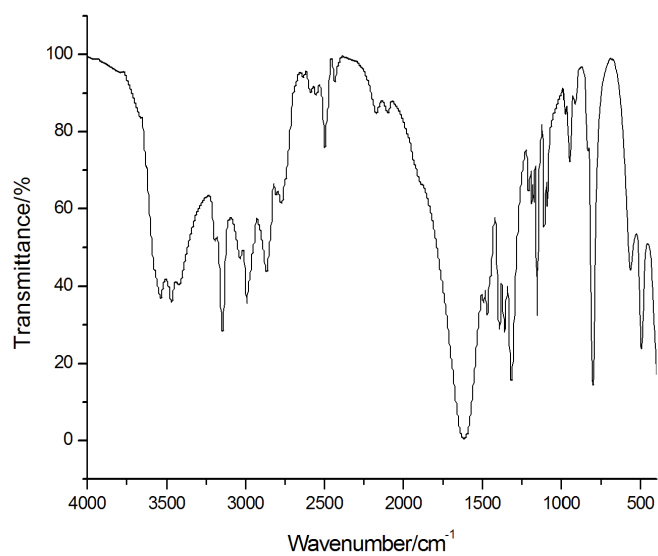

**Figure S5.** IR spectrum of compound **2**

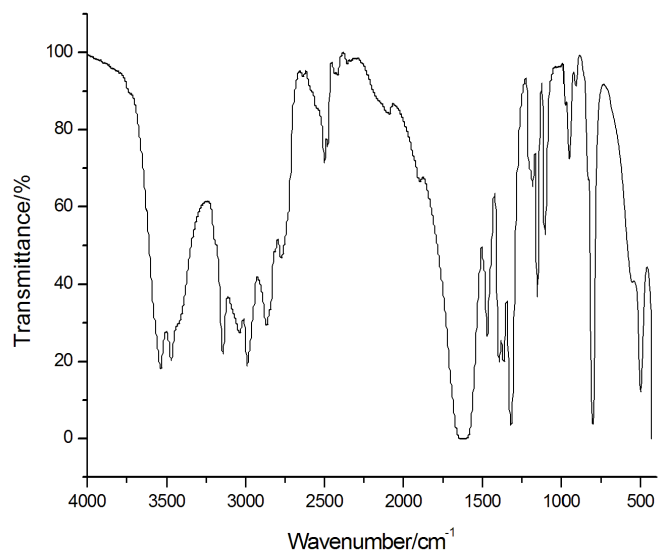

**Figure S6.** IR spectrum of compound **3**

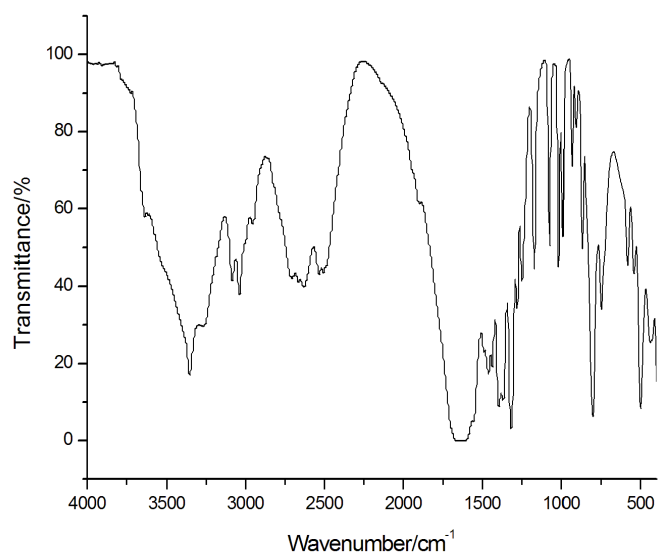

**Figure S7.** IR spectrum of compound **4**

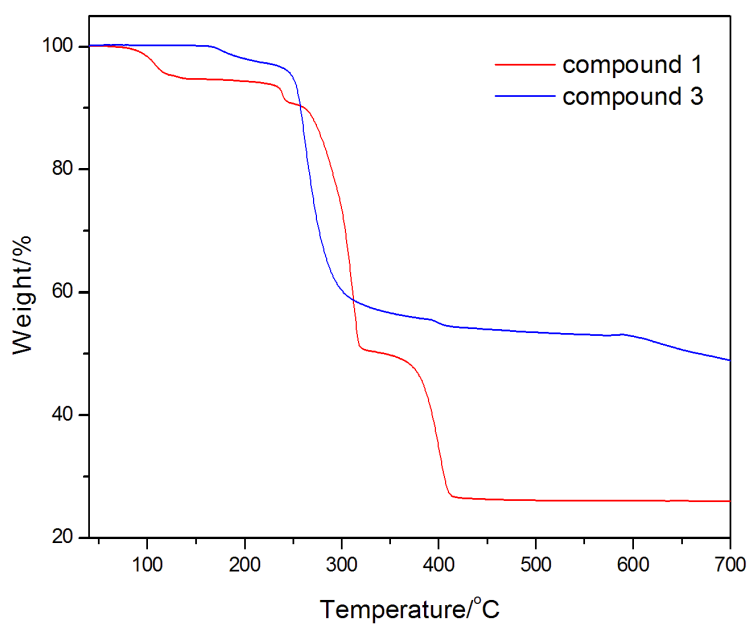

**Figure S8.** TGA curves of compounds **1** and **3**.

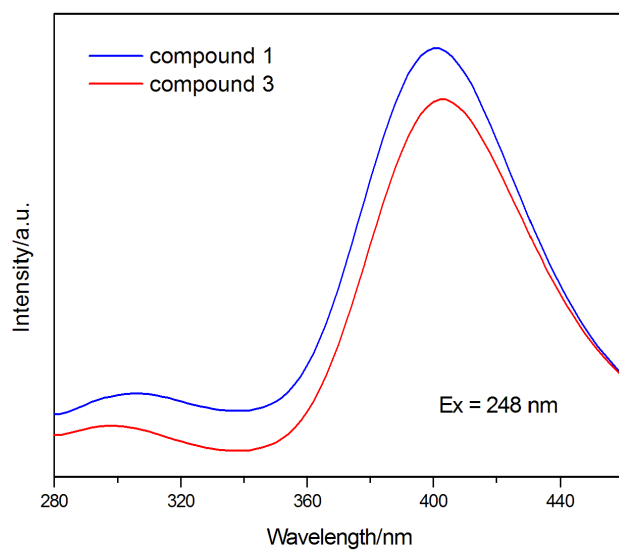

**Figure S9.** Solid state fluorescent spectra of compounds **1** and **3** at room temperature ( $\lambda_{\text{ex}} = 248 \text{ nm}$ ).

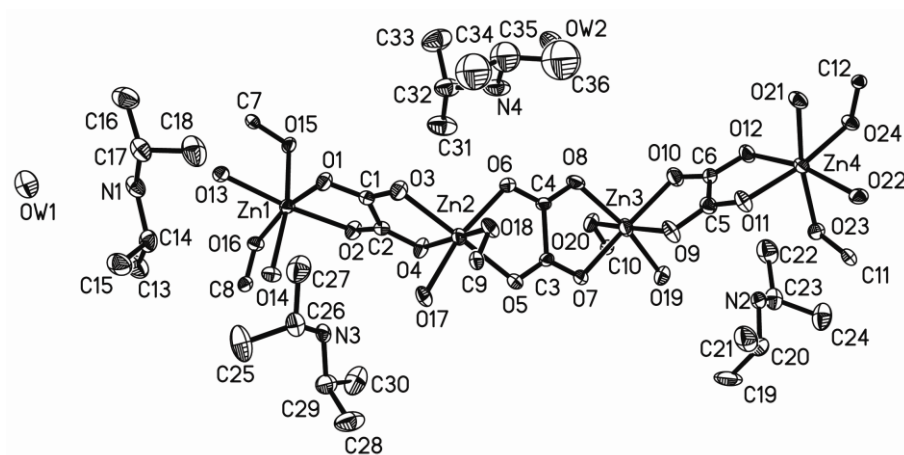

**Figure S10.** ORTEP plot of the asymmetric unit of compound **1** showing the labeling scheme and the 30% probability displacement ellipsoid.



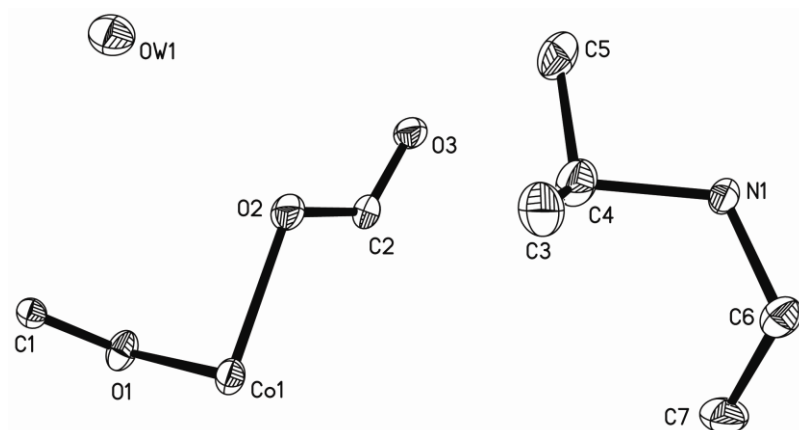

**Figure S11.** ORTEP plot of the asymmetric unit of compound **2** showing the labeling scheme and the 30% probability displacement ellipsoid.

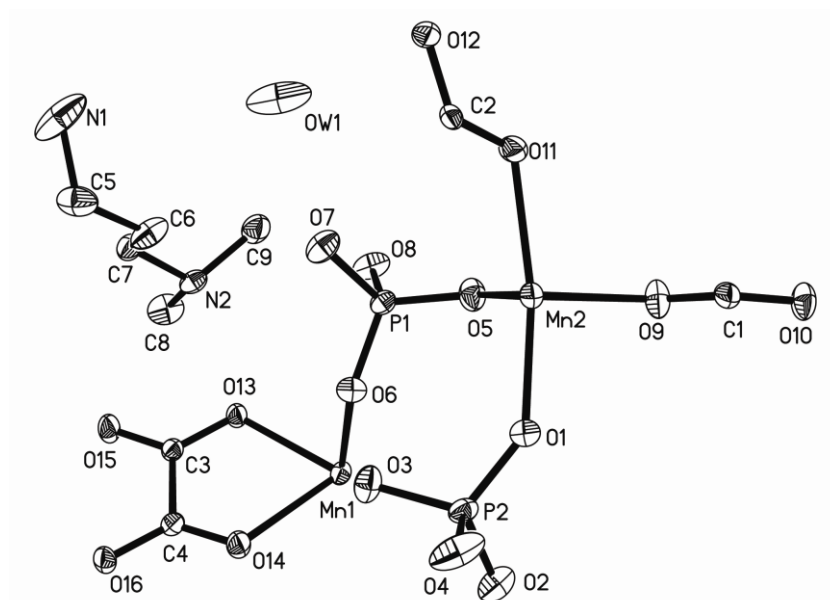

**Figure S12.** ORTEP plot of the asymmetric unit of compound **3** showing the labeling scheme and the 30% probability displacement ellipsoid.

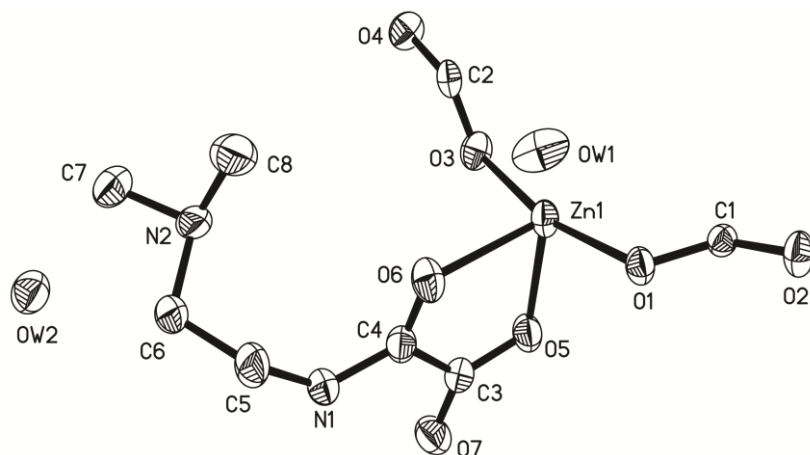

**Figure S13.** ORTEP plot of the asymmetric unit of compound **4** showing the labeling scheme and the 30% probability displacement ellipsoid.

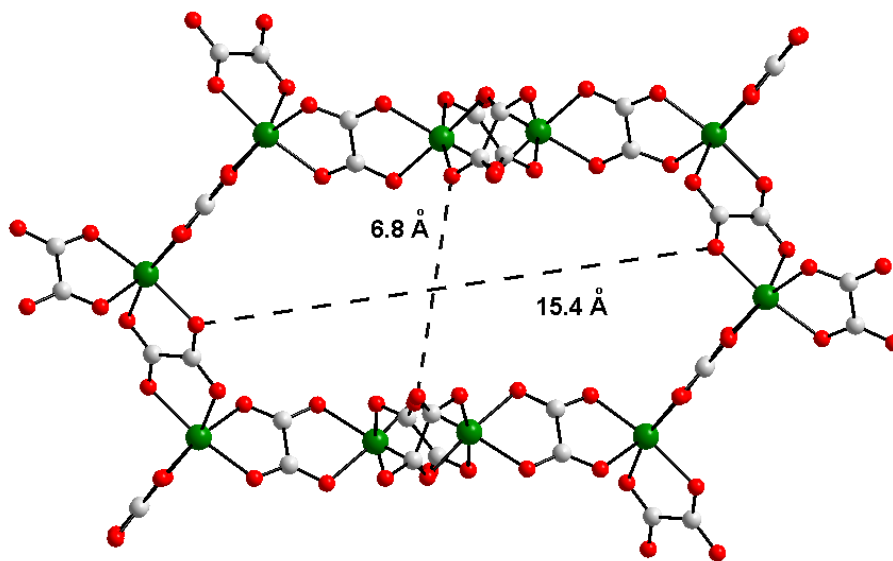

**Figure S14.** A view of the 20-ring window in compound **1**. Color code: Zn: green; C: gray; O, red.

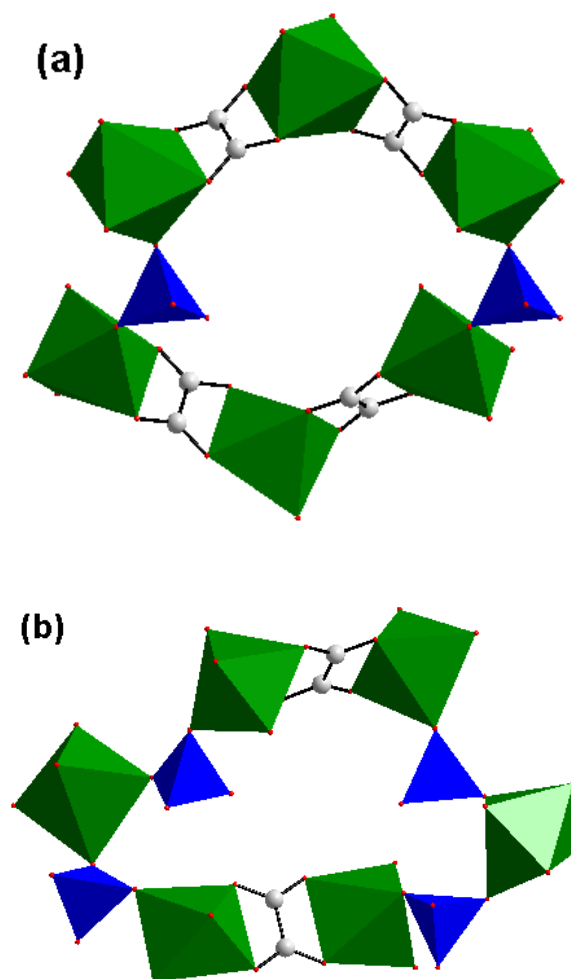

**Figure S15.** Two types of 12-ring windows in compound **3**. (a) Type I pore consists of six MnO<sub>6</sub>, four oxalate groups, and two H<sub>2</sub>PO<sub>4</sub> tetrahedra. (b) Type II consists of six MnO<sub>6</sub>, two oxalate groups, and four H<sub>2</sub>PO<sub>4</sub> tetrahedra. Color code: MnO<sub>6</sub> octahedra: green; H<sub>2</sub>PO<sub>4</sub> tetrahedra: blue; C: gray; O, red.
